# Supplementary material for: Rapid screening for specific glycosylation and pathogen interactions on a 78 species avian egg white glycoprotein microarray
Source: PubMed Central journal article supplement (PMC5526940; doi:10.1038/s41598-017-06797-6), 2017-07-25
Supplement: 41598_2017_6797_MOESM1_ESM.pdf [file 41598_2017_6797_MOESM1_ESM.pdf]

## Supplementary Information

### Rapid screening for specific glycosylation and pathogen interactions on a 78 species avian egg white glycoprotein microarray

Marta Utratna<sup>1</sup>, Heidi Annuk<sup>1</sup>, Jared Q. Gerlach<sup>1,2</sup>, Yuan C. Lee<sup>3</sup>, Marian Kane<sup>1</sup>, Michelle Kilcoyne<sup>4</sup>, Lokesh Joshi<sup>1</sup>

<sup>1</sup>Glycoscience Group, National Centre for Biomedical Engineering Science, National University of Ireland Galway, Galway, Ireland

<sup>2</sup>Regenerative Medicine Institute, National University of Ireland Galway, Galway, Ireland

<sup>3</sup> Department of Biology, Johns Hopkins University, 3400 North Charles Street, Baltimore, Maryland 21218, U.S.A.

<sup>4</sup> Carbohydrate Signalling Group, Microbiology, School of Natural Sciences, National University of Ireland Galway, Galway, Ireland

### Table of Contents

|                                                            |      |
|------------------------------------------------------------|------|
| LIST OF SUPPLEMENTARY FIGURES AND TABLES                   | S-2  |
| RESULTS AND DISCUSSION                                     | S-3  |
| Solubilisation optimisation                                | S-3  |
| Optimisation of EW microarray printing                     | S-3  |
| Performance of lectins with printed glycoprotein standards | S-5  |
| Additional tables                                          | S-7  |
| Additional figures                                         | S-11 |
| REFERENCES                                                 | S-15 |

## LIST OF SUPPLEMENTARY FIGURES AND TABLES

**Figure S1.** Optimisation of EW's for printing.

**Figure S2.** Analysis of glycoproteins (other than chicken EW glycoproteins) included as controls in the two panels of EW microarray.

**Figure S3.** PHA-E lectin binding profile across all EWs.

**Figure S4.** N-linked structures unique for either Anseriformes or Galliformes.

**Figure S5.** SNA-I and MAA lectin binding profiles of the 28 species representing Anseriformes and Galliformes included in this study.

**Figure S6.** Phylogenic tree of birds used in this study according to DNA-DNA hybridisation<sup>1</sup> (adapted from Suzuki, *et al.*, 2004<sup>2</sup>).

**Table S1.** Species of origin of avian EW microarray. Birds grouped by systematic order indicated by an assigned capital letter (A-P).

**Table S2.** Two printing panels of EW microarray. The samples are listed based on their printing location.

**Table S3 (.xls file).** Data for lectin and toxin interactions with EW microarray. Normalised fluorescence intensities from incubations of all lectins used in this study, together with their respective inhibitions (**Table 1**) and two toxins with the EW microarray (78 EWs and 17 overlapping standards). Standard deviation for all replicates included. Percentage inhibition was calculated based on the mean values. Coefficient of variation expressed as a percentage (%CV) for all interactions and inhibitions was included.

## RESULTS AND DISCUSSION

### Optimisation of EW solubilisation

Prior to electrophoresis, solubilisation optimisation was carried out on lyophilised pigeon EW (PEW), gull EW (GEW), CEW, DEW and QEW samples to ensure maximum protein retention. Solubilisation in PBS resulted in a proportion of insoluble aggregates which were removed by centrifugation and filtration. Subsequent delipidisation and acetone precipitation resulted in significant loss of protein, e.g. the protein content of GEW and PEW decreased to 20% and 24% of the original PBS solubilised content, respectively, after delipidisation and 9% and 18%, respectively, after acetone precipitation (data not shown). Fresh CEW is approximately 12% protein by weight with only approximately 0.2% lipid and 0.7% free carbohydrate content,<sup>3</sup> and centrifugation and filtration was found to be sufficient prior to SDS-PAGE analysis and microarray printing.

### Optimisation of EW microarray printing

The Nexterion® Slide H microarray slides were selected for optimal background and chemical compatibility as previously described.<sup>4,5</sup> PEW, GEW, CEW, DEW and QEW samples were used to optimise microarray printing and were printed at 0.1 to 0.6 mg/ml, either in PBS or PBS with 0.05% Tween 20 (PBS-T) using a piezoelectric dispenser capillary (PDC) with a hydrophobic coating. The printed slides were incubated with a panel of selected TRITC-labelled lectins (**Table 1**) to monitor the printed feature quality. The lectins were selected based on the glycosylation motifs expected to be present in the EW samples.<sup>2,6</sup> Not all interactions were inhibitable (Supplementary **Table S3** and **Figure S2**). The average inter-array coefficient of variance (%CV) for all lectins was ~16% (range 5% to 45%) for the 78 EWs and ~16% (range <1% to 40%) for the glycoprotein standards (Supplementary **Table S3**). These ranges were lower than expected based on the high viscosity of the samples and %CV reported for other protein-based microarrays.<sup>4,7</sup>

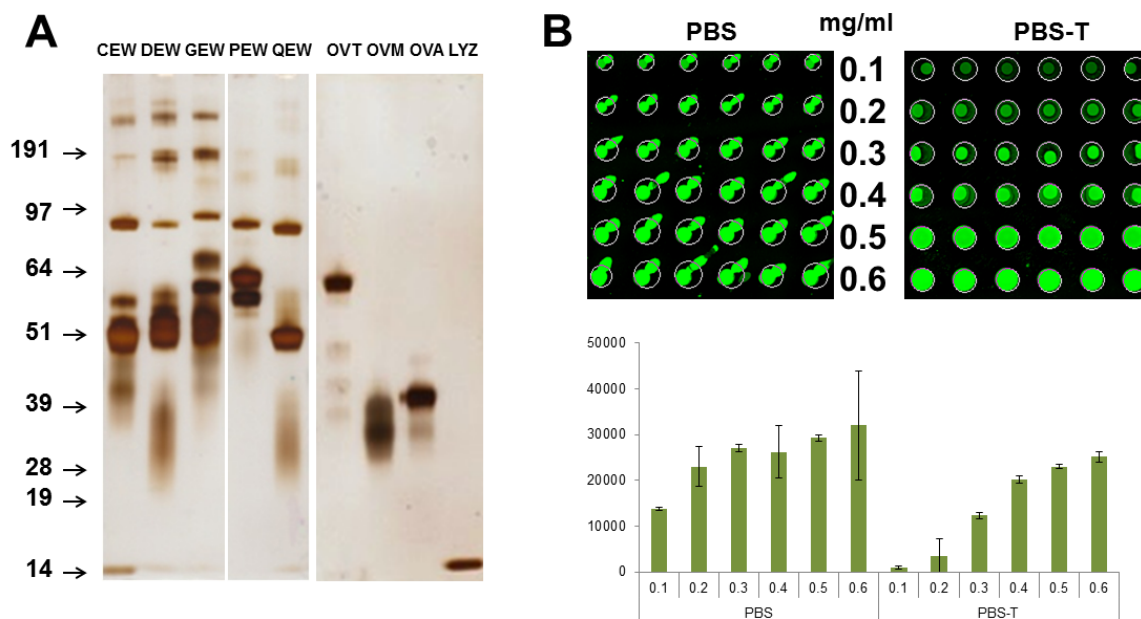

**Figure S1. Optimisation of EWs for printing.** A) Protein profiles of selected EWs. Samples of five EWs (1  $\mu\text{g}$  per lane, dissolved in PBS pH 7.4) were separated on 10% SDS-PAGE /MOPS and silver stained; commercial (Sigma) purified chicken standards (0.5  $\mu\text{g}$  per lane): ovotransferin (OVT), ovomucoid (OVM), ovalbumin (OVA) and lysosyme (LYZ) were used. B) Schematic of printing layout for the PEW sample printed in gradually increasing concentrations: 0.1-0.6 mg/mL in PBS pH 7.4 (left half) or 0.05% PBS-T (right half). Each sample was printed six times, resulting in six replicate spots. The example illustrates the binding of PEW with PHA-E incubated at a concentration of 0.7  $\mu\text{g}/\text{ml}$ . An extraction grid was loaded on top of the imaged spots to indicate the challenges of data extraction, including proper feature fitting. C) Histogram illustrating the mean fluorescence intensity from part B to compare the variability within six replicates. Error bars indicate the standard deviation for the fluorescence intensity of six replicate features for each sample.

Five lectins from the initial library (VVA-B4, PNA, VRA, UEA-I and Jacalin) demonstrated very low binding (data not shown) and did not reach the threshold for inhibition (a minimum of 25% reduction of binding intensity upon co-incubation with appropriate hapten on average for all printed samples). Thus, these five lectins were excluded from the subsequent glycosylation analysis which included the remaining 14 lectins (**Table 1**).

Uniform feature morphology is required for reliable microarray data extraction and the addition of detergent resulted in round features with an average size of 150  $\mu\text{m}$  (Supplementary **Figure S1B**). A concentration-dependent increase in lectin binding was observed up to 0.6 mg/ml, the maximum concentration possible to print for the majority of EWs due to their limited availability (Supplementary **Figure S1C**). Standard glycoproteins were included to monitor lectin performance and were printed at 0.5 mg/ml with 0.01% Tween 20 with the exception of OVA and OVM, which were optimally printed with 0.015% Tween 20 (Supplementary **Table S2**).

### **Performance of lectins with printed glycoprotein standards**

Glycoprotein standards printed on the EW microarray (Supplementary **Figure S2**) demonstrated the expected associations with lectins including binding of the mannose- (Man-) specific lectins NPA and GNA to yeast invertase, which has high- and oligo-mannose type *N*-linked oligosaccharides.<sup>7</sup> The absence of MAA binding to asialofetuin (ASF) confirmed the loss of sialic acid when compared to fetuin and MAA also bound to the serum globulins human  $\alpha$ -1-antitrypsin (A1AT), human  $\alpha$ -1-acid glycoprotein (AGP) and bovine transferrin, as previously reported).<sup>4</sup>

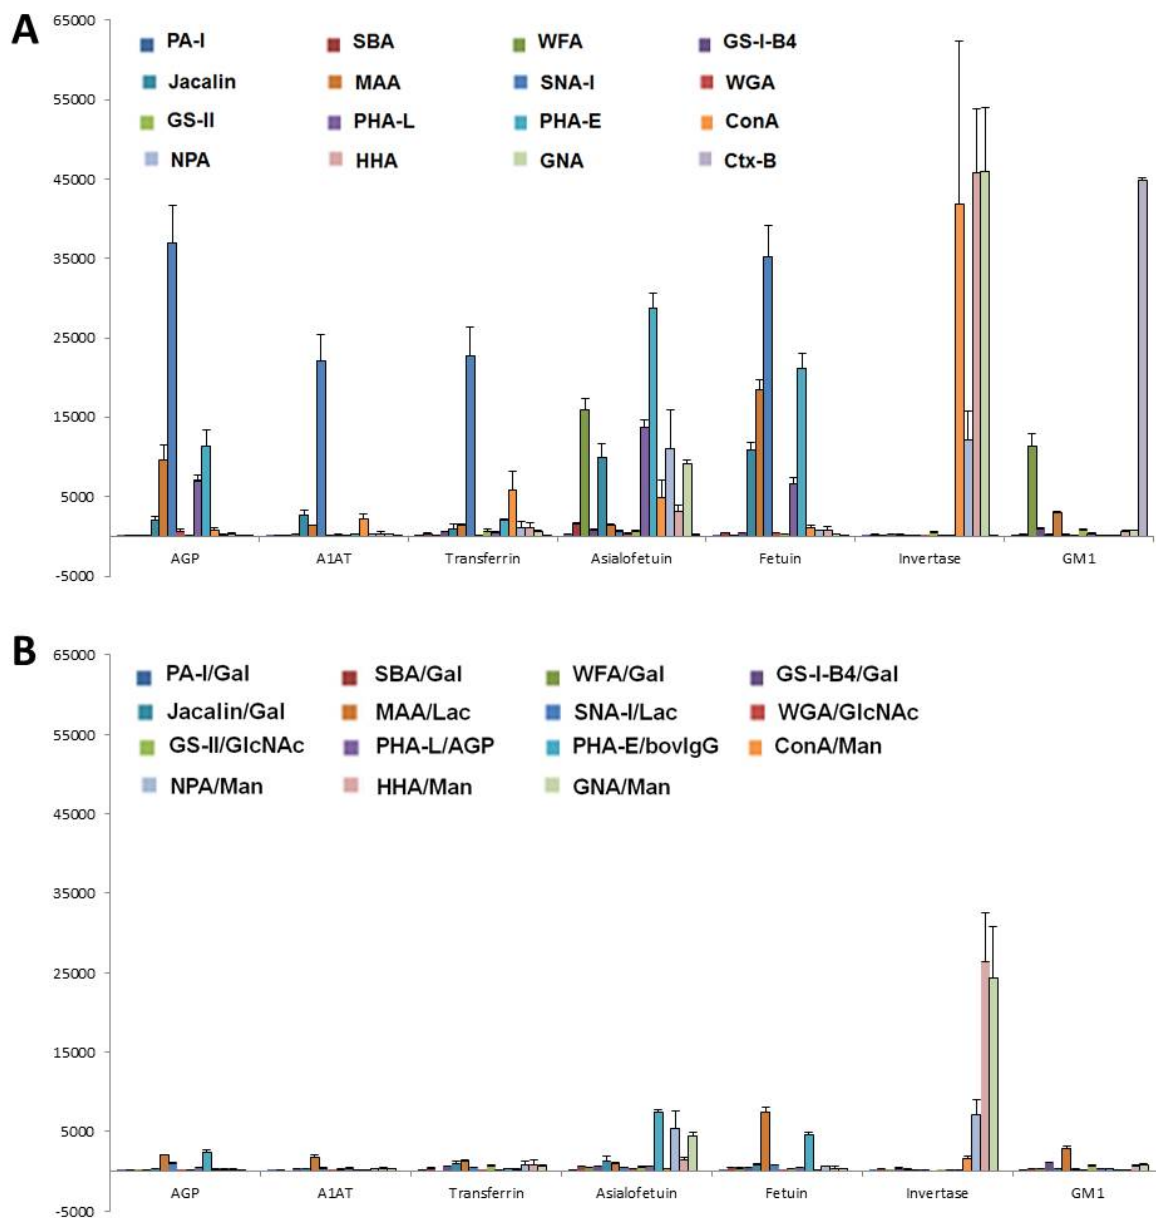

**Figure S2.** Analysis of glycoproteins (other than chicken EW glycoproteins) included as controls in the two panels of EW microarray. A) Lectin profiles, B) inhibition. Lectin binding profiles of fifteen selected lectins recognised as specific interaction and cholera toxin (Ctx-B), together with their concentrations listed in brackets. The lectin AIA (Jacalin) had carbohydrate inhibitable binding for the glycoprotein standards (non-EW) included on the microarray as controls (included in this figure in the carbohydrate-mediated lectin binding library). The fluorescence intensity values shown are the average of the normalised data from three replicates, with error bars indicating one standard deviation. Error bars are one standard deviation for the mean of all replicates (Supplementary **Table S3**).

## Additional tables

**Table S1.** Species of origin of avian EW microarray. Birds grouped by systematic order indicated by an assigned capital letter (A-P).

| Common name           | Genus and species                   | Abbreviation | Order code | Order         | Family            |
|-----------------------|-------------------------------------|--------------|------------|---------------|-------------------|
| Magpie goose          | <i>Anseranas semipalmata</i>        | MGP          | A          | Anseriformes  | Anseranatidae     |
| Plumed whistling-duck | <i>Dendrocygna eytoni</i>           | PWD          | A          | Anseriformes  | Dendrocygnidae    |
| Redhead               | <i>Aythya americana</i>             | RED          | A          | Anseriformes  | Anatidae          |
| Ringed teal           | <i>Callonetta (Anas) leucophrys</i> | RIT          | A          | Anseriformes  | Anatidae          |
| Barrow's goldeneye    | <i>Bucephala islandica</i>          | BGE          | A          | Anseriformes  | Anatidae          |
| Eurasian widgeon      | <i>Anas penelope</i>                | EAW          | A          | Anseriformes  | Anatidae          |
| Domesticated duck     | <i>Anas platyrhynchos</i>           | DEW          | A          | Anseriformes  | Anatidae          |
| Wood duck             | <i>Aix sponsa</i>                   | WOD          | A          | Anseriformes  | Anatidae          |
| Black swan            | <i>Cygnus atratus</i>               | SWN          | A          | Anseriformes  | Anatidae          |
| Canada goose          | <i>Branta canadensis</i>            | CNG          | A          | Anseriformes  | Anatidae          |
| Southern screamer     | <i>Chauna torquata</i>              | SOS          | A          | Anseriformes  | Anhimidae         |
| Gull                  | <i>Larus argentatus</i>             | GEW          | B          | Ciconiiformes | Laridae           |
| Herring gull          | <i>Larus argentatus</i>             | HGL          | B          | Ciconiiformes | Laridae           |
| Black-winged stilt    | <i>Himantopus himantopus</i>        | BWS          | B          | Ciconiiformes | Charadriidae      |
| Spur-winged lapwing   | <i>Vanellus spinosus</i>            | SPL          | B          | Ciconiiformes | Charadriidae      |
| Adelie penguin        | <i>Pygoscelis adeliae</i>           | APE          | B          | Ciconiiformes | Spheniscidae      |
| Humboldt penguin      | <i>Spheniscus humboldti</i>         | HPE          | B          | Ciconiiformes | Spheniscidae      |
| Macaroni penguin      | <i>Eudyptes chrysolophus</i>        | MPE          | B          | Ciconiiformes | Spheniscidae      |
| Brahminy kite         | <i>Haliastur indus</i>              | BRK          | B          | Ciconiiformes | Accipitridae      |
| Crested caracara      | <i>Polyborus plancus</i>            | CRC          | B          | Ciconiiformes | Falconidae        |
| Chimango caracara     | <i>Milvago chimango</i>             | CMC          | B          | Ciconiiformes | Falconidae        |
| Great-crested grebe   | <i>Podiceps cristatus</i>           | GCG          | B          | Ciconiiformes | Podicipedidae     |
| Great cormorant       | <i>Phalacrocorax carbo</i>          | GCM          | B          | Ciconiiformes | Phalacrocoracidae |
| Greater flamingo      | <i>Phoenicopterus ruber</i>         | GFN          | B          | Ciconiiformes | Phoenicopteridae  |

|                           |                                    |     |          |               |                |
|---------------------------|------------------------------------|-----|----------|---------------|----------------|
| Mascarene reef-egret      | <i>Egretta dimorpha</i>            | MRE | <b>B</b> | Ciconiiformes | Ardeidae       |
| Little blue heron         | <i>Egretta caerulea</i>            | LBH | <b>B</b> | Ciconiiformes | Ardeidae       |
| Domestic pigeon           | <i>Columba liviadomestica</i>      | PEW | <b>C</b> | Columbiformes | Columbidae     |
| Common crowned pigeon     | <i>Goura cristata</i>              | CPI | <b>C</b> | Columbiformes | Columbidae     |
| Mourning dove             | <i>Zenaida macroura</i>            | MOD | <b>C</b> | Columbiformes | Columbidae     |
| Rock dove                 | <i>Columba livia</i>               | RKD | <b>C</b> | Columbiformes | Columbidae     |
| Laughing kookaburra       | <i>Dacelo novaeguineae</i>         | LGK | <b>D</b> | Coraciiformes | Halcyonidae    |
| Malle fowl                | <i>Leipoa ocellata</i>             | MLF | <b>E</b> | Craciformes   | Megapodiidae   |
| Razor-billed curassow     | <i>Crax mitu</i>                   | RCU | <b>E</b> | Craciformes   | Cracidae       |
| Coral-billedground-cuckoo | <i>Carpococcyx renauldi</i>        | CGC | <b>F</b> | Cuculiformes  | Cuculidae      |
| Roadrunner                | <i>Geococcyx californianus</i>     | RDR | <b>F</b> | Cuculiformes  | Neomorphidae   |
| Domesticated chicken      | <i>Gallus gallus domesticus</i>    | CEW | <b>G</b> | Galliformes   | Phasianidae    |
| Wild turkey               | <i>Meleagris gallopavo</i>         | TKY | <b>G</b> | Galliformes   | Phasianidae    |
| Coqui francolin           | <i>Francolinus coqui</i>           | COF | <b>G</b> | Galliformes   | Phasianidae    |
| Scaled (blue) quail       | <i>Callipepla squamata pallida</i> | SCQ | <b>G</b> | Galliformes   | Odontophoridae |
| Japanese quail            | <i>Coturnix japonica</i>           | QEW | <b>G</b> | Galliformes   | Phasianidae    |
| Mountain quail            | <i>Oreortyx pictus</i>             | MTQ | <b>G</b> | Galliformes   | Odontophoridae |
| Congo peafowl             | <i>Afropavo congensis</i>          | CPF | <b>G</b> | Galliformes   | Phasianidae    |
| Cabot's tragopan          | <i>Tragopan caboti</i>             | CTP | <b>G</b> | Galliformes   | Phasianidae    |
| White-tailed ptarmigan    | <i>Lagopus leucurus</i>            | TTR | <b>G</b> | Galliformes   | Phasianidae    |
| Malay great argus         | <i>Argusianus argus</i>            | MGA | <b>G</b> | Galliformes   | Phasianidae    |
| Ruffed grouse             | <i>Bonasa umbellus</i>             | RFG | <b>G</b> | Galliformes   | Phasianidae    |
| Satyr tragopan            | <i>Tragopan Satyra</i>             | STP | <b>G</b> | Galliformes   | Phasianidae    |
| Silver pheasant           | <i>Lophura nychthermera</i>        | SVP | <b>G</b> | Galliformes   | Phasianidae    |
| Helmet guineafowl         | <i>Numida Meleagris</i>            | GUI | <b>G</b> | Galliformes   | Numididae      |
| Vulturine guineafowl      | <i>Acryllium vulturinum</i>        | VGU | <b>G</b> | Galliformes   | Numididae      |
| Black-legged seriema      | <i>Chunga burmeisteri</i>          | BLS | <b>H</b> | Gruiformes    | Cariamidae     |
| Japanese crane            | <i>Grus japonensis</i>             | JPC | <b>H</b> | Gruiformes    | Gruidae        |



|                            |                                 |     |          |                  |               |
|----------------------------|---------------------------------|-----|----------|------------------|---------------|
| White-naped crane          | <i>Grus vipio</i>               | WNC | <b>H</b> | Gruiformes       | Gruidae       |
| White-cheeked turaco       | <i>Turaco leucotis</i>          | WCT | <b>I</b> | Musophagiformes  | Musophagidae  |
| Albert's lyrebird          | <i>Menura alberti</i>           | ABL | <b>J</b> | Passeriformes    | Menuridae     |
| Blue-shouldered robin-chat | <i>Cossypha cyanocampter</i>    | BRC | <b>J</b> | Passeriformes    | Muscicapidae  |
| Crimson finch              | <i>Neochmia phaeton</i>         | CFI | <b>J</b> | Passeriformes    | Passeridae    |
| House sparrow              | <i>Passer domesticus</i>        | HOS | <b>J</b> | Passeriformes    | Passeridae    |
| Common starling            | <i>Sturnus vulgaris</i>         | CNS | <b>J</b> | Passeriformes    | Sturnidae     |
| Masked woodswallow         | <i>Artamus personatus</i>       | MWS | <b>J</b> | Passeriformes    | Corvidae      |
| American robin             | <i>Turdus migratorius</i>       | ROB | <b>J</b> | Passeriformes    | Muscicapidae  |
| Common flicker             | <i>Colaptes auratus</i>         | CFL | <b>K</b> | Piciformes       | Picidae       |
| Budgerigar                 | <i>Melopsittacus undulatus</i>  | BGR | <b>L</b> | Psittaciformes   | Psittacidae   |
| Grey parrot                | <i>Psittacus erithacus</i>      | GPT | <b>L</b> | Psittaciformes   | Psittacidae   |
| Turquoise-fronted parrot   | <i>Amazona aestiva</i>          | TPT | <b>L</b> | Psittaciformes   | Psittacidae   |
| White-capped parrot        | <i>Pionus senilis</i>           | WPT | <b>L</b> | Psittaciformes   | Psittacidae   |
| Yellow-headed parrot       | <i>Amazoa ochrocephala</i>      | YPT | <b>L</b> | Psittaciformes   | Psittacidae   |
| Barn owl                   | <i>Tyto alba</i>                | BOW | <b>M</b> | Strigiformes     | Tytonidae     |
| Snowy owl                  | <i>Nyctea scandiaca</i>         | SNO | <b>M</b> | Strigiformes     | Strigidae     |
| Australian cassowary       | <i>Casuarius casuarius</i>      | ASC | <b>N</b> | Struthioniformes | Casuariidae   |
| Emu                        | <i>Dromaius novaehollandiae</i> | EMU | <b>N</b> | Struthioniformes | Casuariidae   |
| Ostrich                    | <i>Struthio camelus</i>         | OST | <b>N</b> | Struthioniformes | Struthionidae |
| Greater rhea               | <i>Rhea americana</i>           | REA | <b>N</b> | Struthioniformes | Rheidae       |
| Brushland tinamou          | <i>Nothoprocta cinerascens</i>  | BTI | <b>O</b> | Tinamiformes     | Tinamidae     |
| Elegant crested-tinamou    | <i>Euotromia elegans</i>        | CTI | <b>O</b> | Tinamiformes     | Tinamidae     |
| Great tinamou              | <i>Tinamus major</i>            | GTI | <b>O</b> | Tinamiformes     | Tinamidae     |
| Brown-rumped buttonquail   | <i>Turnix nana</i>              | BRQ | <b>P</b> | Turniciformes    | Turnicidae    |
| Small buttonquail          | <i>Turnix sylvatica</i>         | BUQ | <b>P</b> | Turniciformes    | Turnicidae    |

**Table S2.** Two printing panels of EW microarray. The samples are listed based on their printing location.

| PANEL_A                                                 |                       |                         |                  | PANEL_B               |                         |                  |                                                 | Sample type: |
|---------------------------------------------------------|-----------------------|-------------------------|------------------|-----------------------|-------------------------|------------------|-------------------------------------------------|--------------|
|                                                         | Abbreviation          | printing conc.<br>mg/ml | final<br>Tween20 | Abbreviation          | printing conc.<br>mg/ml | final<br>Tween20 |                                                 |              |
| 1                                                       | APE (02)              | 0.6                     | 0.01 %T          | ABL (01)              | 0.6                     | 0.01 %T          | Egg white - small scale                         |              |
| 2                                                       | BGE (05)              | 0.6                     | 0.01 %T          | ASC (03)              | 0.6                     | 0.01 %T          | Egg white - small scale                         |              |
| 3                                                       | EAW (28)              | 0.6                     | 0.01 %T          | EAW (28)              | 0.6                     | 0.01 %T          | Egg white - small scale                         |              |
| 4                                                       | BRK (10)              | 0.6                     | 0.01 %T          | BGR (06)              | 0.6                     | 0.01 %T          | Egg white - small scale                         |              |
| 5                                                       | BTI (12)              | 0.6                     | 0.01 %T          | BLS (07)              | 0.6                     | 0.01 %T          | Egg white - small scale                         |              |
| 6                                                       | OVA 0.5               | 0.5                     | 0.015 %T         | OVA 0.5               | 0.5                     | 0.015 %T         | glycoprotein (chicken egg white)                |              |
| 7                                                       | BUQ (13)              | 0.6                     | 0.01 %T          | BOW (08)              | 0.6                     | 0.01 %T          | Egg white - small scale                         |              |
| 8                                                       | CFL (17)              | 0.6                     | 0.01 %T          | BRC (09)              | 0.6                     | 0.01 %T          | Egg white - small scale                         |              |
| 9                                                       | OVT 0.5               | 0.5                     | 0.01 %T          | OVT 0.5               | 0.5                     | 0.01 %T          | glycoprotein (chicken egg white)                |              |
| 10                                                      | CNG (20)              | 0.6                     | 0.01 %T          | BRQ (11)              | 0.6                     | 0.01 %T          | Egg white - small scale                         |              |
| 11                                                      | CNS (21)              | 0.6                     | 0.01 %T          | BWS (15)              | 0.6                     | 0.01 %T          | Egg white - small scale                         |              |
| 12                                                      | OVM 0.5               | 0.5                     | 0.015 %T         | OVM 0.5               | 0.5                     | 0.015 %T         | glycoprotein (chicken egg white)                |              |
| 13                                                      | COF (22)              | 0.6                     | 0.01 %T          | CFI (16)              | 0.6                     | 0.01 %T          | Egg white - small scale                         |              |
| 14                                                      | CPI (24)              | 0.6                     | 0.01 %T          | CGC (18)              | 0.6                     | 0.01 %T          | Egg white - small scale                         |              |
| 15                                                      | Transferrin/Invertase | 0.5                     | 0.01 %T          | Transferrin/Invertase | 0.5                     | 0.01 %T          | glycoprotein                                    |              |
| 16                                                      | CTI (26)              | 0.6                     | 0.01 %T          | CMC (19)              | 0.6                     | 0.01 %T          | Egg white - small scale                         |              |
| 17                                                      | CTP (27)              | 0.6                     | 0.01 %T          | CPF (23)              | 0.6                     | 0.01 %T          | Egg white - small scale                         |              |
| 18                                                      | ASF                   | 0.5                     | 0.01 %T          | ASF                   | 0.5                     | 0.01 %T          | glycoprotein                                    |              |
| 19                                                      | GPT (33)              | 0.6                     | 0.01 %T          | CRC (25)              | 0.6                     | 0.01 %T          | Egg white - small scale                         |              |
| 20                                                      | GTI (34)              | 0.6                     | 0.01 %T          | EMU (29)              | 0.6                     | 0.01 %T          | Egg white - small scale                         |              |
| 21                                                      | Fetuin                | 0.5                     | 0.01 %T          | Fetuin                | 0.5                     | 0.01 %T          | glycoprotein                                    |              |
| 22                                                      | GUI (35)              | 0.6                     | 0.01 %T          | GCG (30)              | 0.6                     | 0.01 %T          | Egg white - small scale                         |              |
| 23                                                      | HGL (36)              | 0.6                     | 0.01 %T          | GCM (31)              | 0.6                     | 0.01 %T          | Egg white - small scale                         |              |
| 24                                                      | PEW                   | 0.6                     | 0.01 %T          | PEW                   | 0.6                     | 0.01 %T          | Egg white - large scale                         |              |
| 25                                                      | HOS (37)              | 0.6                     | 0.01 %T          | GFN (32)              | 0.6                     | 0.01 %T          | Egg white - small scale                         |              |
| 26                                                      | MGA (42)              | 0.6                     | 0.01 %T          | HPE (38)              | 0.6                     | 0.01 %T          | Egg white - small scale                         |              |
| 27                                                      | GEW                   | 0.6                     | 0.01 %T          | GEW                   | 0.6                     | 0.01 %T          | Egg white - large scale                         |              |
| 28                                                      | MGP (46)              | 0.6                     | 0.01 %T          | JPC (39)              | 0.6                     | 0.01 %T          | Egg white - small scale                         |              |
| 29                                                      | MTQ (48)              | 0.6                     | 0.01 %T          | LBH (40)              | 0.6                     | 0.01 %T          | Egg white - small scale                         |              |
| 30                                                      | PWD (51)              | 0.6                     | 0.01 %T          | LGK (41)              | 0.6                     | 0.01 %T          | Egg white - small scale                         |              |
| 31                                                      | QEW                   | 0.6                     | 0.01 %T          | QEW                   | 0.6                     | 0.01 %T          | Egg white - large scale                         |              |
| 32                                                      | RCU (52)              | 0.6                     | 0.01 %T          | MLF (43)              | 0.6                     | 0.01 %T          | Egg white - small scale                         |              |
| 33                                                      | RDR (53)              | 0.6                     | 0.01 %T          | MOD (44)              | 0.6                     | 0.01 %T          | Egg white - small scale                         |              |
| 34                                                      | DEW                   | 0.6                     | 0.01 %T          | DEW                   | 0.6                     | 0.01 %T          | Egg white - large scale                         |              |
| 35                                                      | RED (55)              | 0.6                     | 0.01 %T          | MPE (45)              | 0.6                     | 0.01 %T          | Egg white - small scale                         |              |
| 36                                                      | RFG (56)              | 0.6                     | 0.01 %T          | MRE (47)              | 0.6                     | 0.01 %T          | Egg white - small scale                         |              |
| 37                                                      | CEW                   | 0.6                     | 0.01 %T          | CEW                   | 0.6                     | 0.01 %T          | Egg white - large scale                         |              |
| 38                                                      | RIT (57)              | 0.6                     | 0.01 %T          | MWS (49)              | 0.6                     | 0.01 %T          | Egg white - small scale                         |              |
| 39                                                      | RKD (58)              | 0.6                     | 0.01 %T          | OST (50)              | 0.6                     | 0.01 %T          | Egg white - small scale                         |              |
| 40                                                      | AGP                   | 0.5                     | 0.01 %T          | AGP                   | 0.5                     | 0.01 %T          | glycoprotein                                    |              |
| 41                                                      | SCQ (61)              | 0.6                     | 0.01 %T          | REA (54)              | 0.6                     | 0.01 %T          | Egg white - small scale                         |              |
| 42                                                      | SNO (62)              | 0.6                     | 0.01 %T          | ROB (59)              | 0.6                     | 0.01 %T          | Egg white - small scale                         |              |
| 43                                                      | A1AT/Lysosyme         | 0.5                     | 0.01 %T          | A1AT/Lysosyme         | 0.5                     | 0.01 %T          | glycoprotein / glycoprotein (chicken egg white) |              |
| 44                                                      | SOS (63)              | 0.6                     | 0.01 %T          | SPL (64)              | 0.6                     | 0.01 %T          | Egg white - small scale                         |              |
| 45                                                      | STP (65)              | 0.6                     | 0.01 %T          | TKY (68)              | 0.6                     | 0.01 %T          | Egg white - small scale                         |              |
| 46                                                      | GM1-HSA               | 0.5                     | 0.01 %T          | GM1-HSA               | 0.5                     | 0.01 %T          | neoglycoconjugate                               |              |
| 47                                                      | SVP (66)              | 0.6                     | 0.01 %T          | TPT (69)              | 0.6                     | 0.01 %T          | Egg white - small scale                         |              |
| 48                                                      | SWN (67)              | 0.6                     | 0.01 %T          | WCT (74)              | 0.6                     | 0.01 %T          | Egg white - small scale                         |              |
| 49                                                      | PBS-T                 |                         |                  | PBS-T                 |                         |                  | PBS-T                                           |              |
| 50                                                      | TTR (71)              | 0.6                     | 0.01 %T          | WNC (75)              | 0.6                     | 0.01 %T          | Egg white - small scale                         |              |
| 51                                                      | VGU (72)              | 0.6                     | 0.01 %T          | WPT (77)              | 0.6                     | 0.01 %T          | Egg white - small scale                         |              |
| 52                                                      | WOD (76)              | 0.6                     | 0.01 %T          | YPT (78)              | 0.6                     | 0.01 %T          | Egg white - small scale                         |              |
| 16 probes common to both panels for cross normalisation |                       |                         |                  |                       |                         |                  |                                                 |              |

## Additional figures

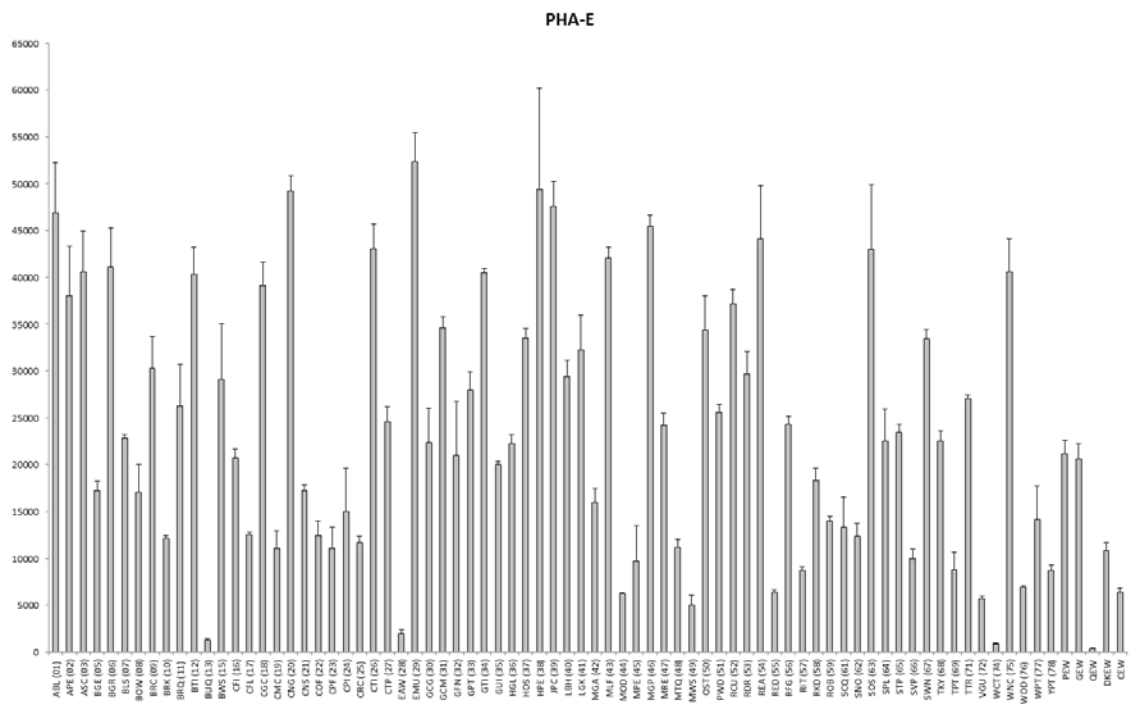

**Figure S3.** PHA-E lectin binding profile across all EWs. Sample bar chart demonstrating range of binding on the microarray. Error bars are one standard deviation for the mean of all replicates (Supplementary **Table S3**).

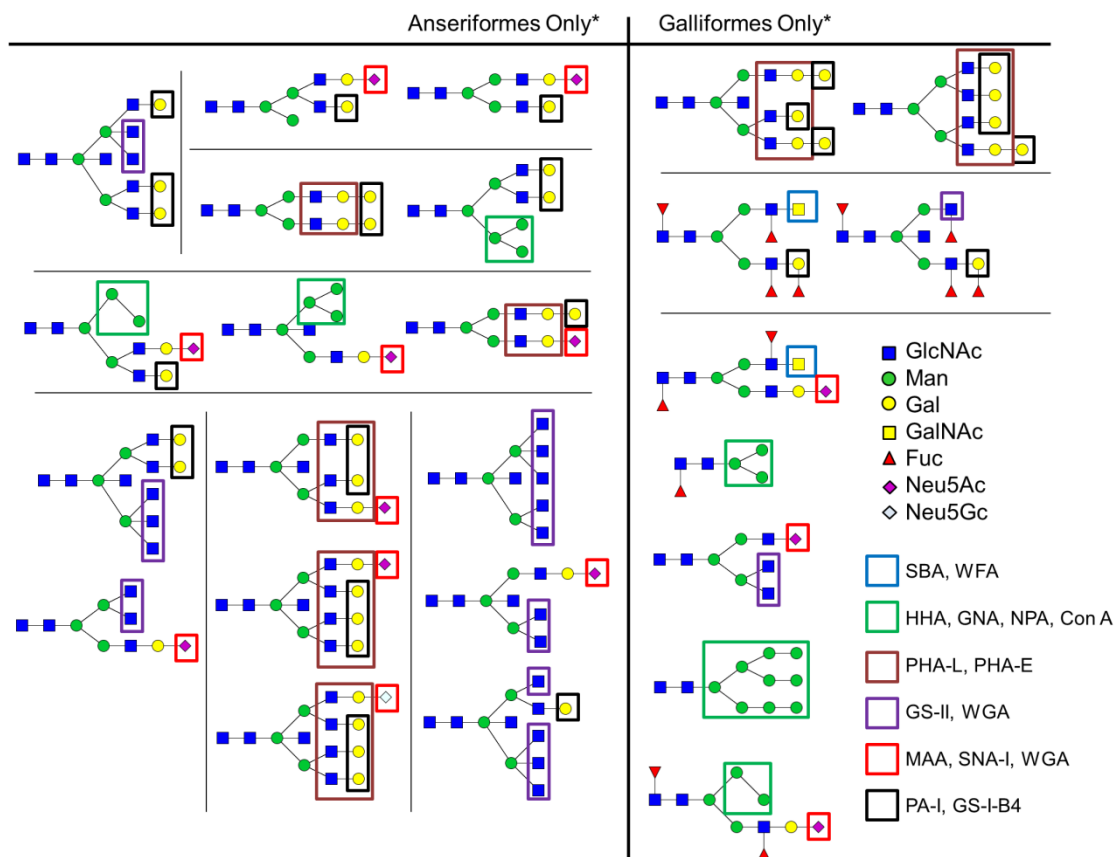

**Figure S4.** *N*-linked structures unique for either Anseriformes or Galliformes previously reported.<sup>6</sup> Coloured rectangles indicate epitopes for interactions with lectins used in this study (**Table 1**).

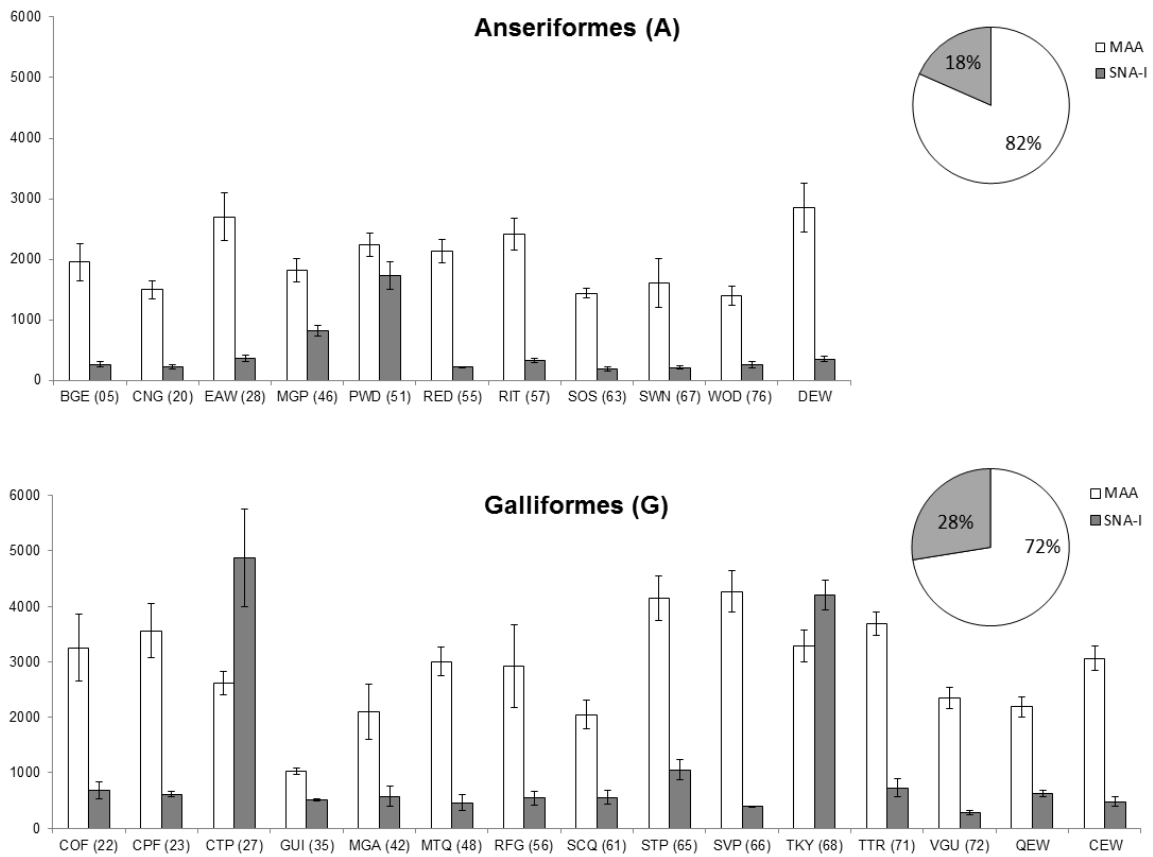

**Figure S5.** Bar charts for SNA-I and MAA lectin binding to the 28 species representing Anseriformes and Galliformes included in this study. Pie charts indicate proportions of MAA and SNA-I within total intensity of each order. Error bars are one standard deviation for the mean of all replicates (Supplementary **Table S3**).

|               | Avian order      | Order code | Example     | This study |             | Overlap   | Suzuki <i>et al.</i> 2004 |            |
|---------------|------------------|------------|-------------|------------|-------------|-----------|---------------------------|------------|
|               |                  |            |             | Con A (+)  | GS-I-B4 (+) |           | Con A (+)                 | GS-I (+)   |
| RATITAE       | Struthioniformes | N          | ostrich     | 2          | 0           | 4         | 4                         | 0          |
|               | Tinamiformes     | O          | tinamou     | 3          | 0           | 3         | 3                         | 0          |
|               | Craciformes      | E          | currassow   | 2          | 0           | 2         | 2                         | 0          |
|               | Galliformes      | G          | chicken     | 13         | 0           | 13        | 13                        | 0          |
|               | Anseriformes     | A          | duck        | 9          | 0           | 10        | 9                         | 0          |
| GALLOANSERAE  |                  |            |             |            |             |           |                           |            |
|               | Turniciformes    | P          | buttonquail | 2          | 1           | 2         | 2                         | 1          |
|               | Piciformes       | K          | flicker     | 1          | 0           | 1         | 1                         | 0          |
|               | Coraciiformes    | D          | kookaburra  | 0          | 0           | 1         | 0                         | 0          |
| NEOAVES       |                  |            |             |            |             |           |                           |            |
|               | Cuculiformes     | F          | cuckoo      | 2          | 2           | 2         | 2                         | 2          |
|               | Psittaciformes   | L          | parrot      | 5          | 5           | 5         | 2                         | 5          |
|               | Musophagiformes  | I          | turaco      | 1          | 1           | 1         | 1                         | 1          |
|               | Strigiformes     | M          | owl         | 2          | 2           | 2         | 2                         | 2          |
|               | Columbiformes    | C          | pigeon      | 3          | 2           | 3         | 2                         | 2          |
|               | Gruiformes       | H          | crane       | 2          | 1           | 3         | 2                         | 1          |
|               | Ciconiiformes    | B          | heron/gull  | 14         | 10          | 14        | 10                        | 10         |
|               | Charadriiformes  | J          | starling    | 7          | 5           | 7         | 7                         | 5          |
| <b>Total:</b> |                  |            |             | <b>68</b>  | <b>29</b>   | <b>73</b> | <b>62</b>                 | <b>29</b>  |
|               |                  |            |             | <b>93%</b> | <b>40%</b>  |           | <b>84%</b>                | <b>40%</b> |

**Figure S6.** Phylogenetic tree of birds used in this study according to DNA-DNA hybridisation<sup>1</sup> (adapted from Suzuki, *et al.*, 2004<sup>2</sup>). The examples of birds were taken from Supplementary **Table S-1** and listed together with a total number of species represented for each order used in this study. The overlap with birds analysed by Suzuki, *et al.*, (2004)<sup>2</sup> is indicated, and the results for Con A and GS-I versus GS-I-B4 are summarised in comparison to this study.

## REFERENCES

1. Sibley, C. G. & Monroe Jr, B. L. Taxonomy and distribution of the birds of the world. Yale University Press, New Haven, Connecticut, USA, 1990.
2. Suzuki, N., Laskowski, M. & Lee, Y. C. Phylogenetic expression of Gal $\alpha$ 1-4Gal on avian glycoproteins: glycan differentiation inscribed in the early history of modern birds. *Proc. Natl. Acad. Sci. U. S. A.* **101**, 9023–9028 (2004).
3. Kovacs-Nolan, J., Phillips, M. & Mine, Y. Advances in the value of eggs and egg components for human health. *J. Agric. Food Chem.* **53**, 8421–8431 (2005).
4. Kilcoyne, M. *et al.* Construction of a natural mucin microarray and interrogation for biologically relevant glyco-epitopes. *Anal. Chem.* **84**, 3330–3338 (2012).
5. Kilcoyne, M. *et al.* *Campylobacter jejuni* strain discrimination and temperature-dependent glycome expression profiling by lectin microarray. *Carbohydr. Res.* **389**, 123–133 (2014).
6. Plasencia, M. D., Isailovic, D., Merenbloom, S. I., Mechref, Y. & Clemmer, D. E. Resolving and assigning N-linked glycan structural isomers from ovalbumin by IMS-MS. *J. Am. Soc. Mass Spectrom.* **19**, 1706–1715 (2008).
7. Gerlach, J. Q., Kilcoyne, M. & Joshi, L. Microarray evaluation of the effects of lectin and glycoprotein orientation and data filtering on glycoform discrimination. *Anal. Methods* **6**, 440 (2014).
